# Supplementary material
Source: PubMed Central journal article supplement (PMC6856338)
Supplement: AEM.01567-19-s0001.pdf [file AEM.01567-19-s0001.pdf]

1 **1. Supplementary Methods**

2 *1.1 DNA-Containing Cell Enumeration*

3 Cells in the precipitation were preserved by adding sodium borate-buffered  
4 formalin (pH=8.2, stored at room temperature) to a final concentration of 5% v/v.  
5 Triplicate samples from each precipitation event were processed by filtering 10 mL of  
6 sample onto 0.22µm, 25mm black polycarbonate filters (Millipore) and staining with a  
7 final concentration of 25X SYBR-Gold (Invitrogen) for 15 min. in the dark. Cell density  
8 estimates were obtained using an epifluorescence microscope (Olympus bx51) and data  
9 from 60 fields of view (1 field of view=34636 µm<sup>2</sup>).

10

11 *1.2 DNA Extraction, Sequencing, and Analysis*

12 The thawed 47mm Supor PES membrane filters were transferred to a laminar  
13 flow hood and cut into small pieces using sterile scissors. The filter pieces were  
14 transferred to a bead beating tube from the FastDNA<sup>TM</sup> SPIN Kit for Soil (MP  
15 Biomedicals, Santa Ana, CA). The DNA was extracted according to the manufacturer's  
16 protocol, with the following modifications: in step 4, a mini bead beater was used to  
17 homogenize extracts for 70 seconds; step 5 was performed for 8 minutes; a 15 mL tube  
18 was used for step 7; and 100 µL of DNase/pyrogen-free water was used to elute DNA in  
19 step 16. The extracts obtained were further purified using steps 14-22 of the  
20 manufacturer's protocol for the MoBio Power Soil Kit (MoBio Laboratories, Carlsbad,  
21 CA). In these steps, 160 µL of solution C4 was added to the DNA extraction. The  
22 manufacturer's protocol was followed for all other steps with the exception of adding 25

23  $\mu$ L of solution C6 and incubating at room temperature prior to centrifugation. The DNA  
24 was stored at  $-20^{\circ}\text{C}$  prior to polymerase chain reaction (PCR) amplification.

25 The V4 region of the bacterial 16S rRNA gene was PCR amplified in triplicate  
26 from each DNA extract for sequencing on the Illumina MiSeq (Illumina, Inc., San Diego,  
27 CA, USA). The PCR was carried out using the barcoded primers and methods of  
28 Caporaso et al. (1). The  $25\mu\text{L}$  reaction contained the following components: 5 Prime  
29 Master Mix (1X),  $0.5\mu\text{M}$  515F,  $0.5\mu\text{M}$  806R and nuclease free water ( $13\mu\text{L}$ ) and  $2.0$   
30  $\mu\text{L}$  of DNA. Thermal-cycling was carried out in an Eppendorf PRO S Master Cycler  
31 (Eppendorf North America, Hauppauge, NY, USA) under the following conditions:  
32 initial denaturation at  $94^{\circ}\text{C}$  for 3 min. followed by 32 cycles of denaturation at  $94^{\circ}\text{C}$  for  
33 1 min., annealing at  $50^{\circ}\text{C}$  for 1 min. extension at  $72^{\circ}\text{C}$  for 1 min. 45 s, and followed by  
34 a final extension at  $72^{\circ}\text{C}$  for 10 min. The amplicons obtained were evaluated by  
35 electrophoretic separation on a 1% agarose gel buffered with Tris-acetate-EDTA and  
36 stained with ethidium bromide. PCR products from the triplicate reactions were pooled,  
37 purified, and concentrated using the Qiagen MinElute PCR Cleanup kit (Qiagen,  
38 Valencia, California, USA) with the optional 35% guanidine-HCl wash step to ensure  
39 removal of large primer-dimers. Amplicons were stored at  $-20^{\circ}\text{C}$  until sequencing at  
40 Idaho State University's Molecular Research Core Facility (Pocatello, ID, USA) on the  
41 Illumina MiSeq Platform (Illumina Inc., San Diego, CA) using the V2 500 bp kit.

42 Sequence data were analyzed using the mothur software package (2). Contigs  
43 were assembled and parsed on the basis of unique barcodes attached to the 806R primer  
44 (1). Sequences that did not contain exact matches to the primer and barcodes utilized in  
45 the PCR amplification were discarded. Sequences were filtered for quality with a 50-base

46 sliding window and a minimum average quality score of 25, and those containing  
47 ambiguous bases, homopolymers (> 7 bases), or having lengths > 259 bases were  
48 eliminated from the dataset.

49

### 50 *1.3 Inorganic Chemical Analyses*

51 Conductivity and pH were measured using a multi-parameter PCSTest probe  
52 (Oakton Instruments, Vernon Hills, IL). Samples of deionized water were routinely  
53 analyzed and served as procedural blanks. A Dionex ICS-3000 ion chromatography  
54 system was used to determine the concentration of major ions in the precipitation  
55 samples. The system was equipped for anion separation with a 4×250 mm RFIC™  
56 IonPac® AS18 column (Dionex Corporation, CA, USA), using a water:potassium  
57 hydroxide eluent, and a 4×250 mm RFIC™ IonPac® CS16 column (Dionex Corporation,  
58 CA, USA) with a water:methanesulfonic acid eluent. Guard columns (Dionex  
59 Corporation, CA, USA) preceded each column (4×50 mm RFIC™ IonPac® AG18 guard  
60 column was used for the anion channel and a 4×50 mm RFIC™ IonPac® CG16 guard  
61 column for the cation channel). Each sample was analyzed in triplicate. With this method,  
62 2 carboxylic acids (formate and oxalate) and 13 inorganic ions ( $F^-$ ,  $Cl^-$ ,  $NO_2^-$ ,  $Br^-$ ,  $NO_3^-$ ,  
63  $SO_4^{2-}$ ,  $PO_4^{3-}$ ,  $Li^+$ ,  $Na^+$ ,  $NH_4^+$ ,  $K^+$ ,  $Mg^{2+}$  and  $Ca^{2+}$ ) could be quantified. The limit of  
64 detection, calculated as three times the standard deviation of the field blanks, was  
65 between 0.1 to 0.8  $\mu M$  for all ions reported.

66

### 67 *1.4 Organic Carbon Concentration, Fluorescent Characterization, and PARAFAC*

#### 68 *Modeling*

69 DOC concentrations were obtained from a GE Sievers 900 Total Organic Carbon  
70 Analyzer. An average DOC measurement was calculated from three measurements of  
71 organic carbon concentrations for each precipitation filtrate sample (sample size ~25  
72 mL). Blank samples of Milli-Q Water were measured between each sample to monitor  
73 successive sample-to-sample contamination throughout instrument use. Acidification  
74 was not necessary prior to experimentation due to an internal acidification step within the  
75 instrument.

76 A Horiba Jobin Yvon Fluoromax-4 Spectrofluorometer generated the Excitation  
77 Emission Matrices (EEMs) of the fluorescent dissolved organic matter (DOM) in the  
78 precipitation samples. This instrument is equipped with a Xenon lamp light source and a  
79 1 cm path length quartz cuvette was used for all measurements. Excitation (Ex)  
80 wavelengths were scanned from 240-450 nm in 10 nm intervals and emission (Em) was  
81 recorded between 300-560 nm in 2 nm increments. Data integration time was 0.25 s and  
82 data acquisition was carried out in signal/reference mode using a 5 nm bandpass on both  
83 Ex and Em monochromators, normalizing the fluorescence Em signal with the Ex light  
84 intensity. Absorbance spectra (190-1100nm) was incorporated into the spectral correction  
85 calculations of primary and secondary inner filter effects for post-processing the  
86 fluorescence data to generate EEMs (3, 4). Spectra were blank corrected against purified  
87 water from a Milli-Q system each day. A Parallel factor analysis (PARAFAC) model  
88 was generated in MATLAB by drEEM and the N-way toolbox scripts (5) to determine  
89 individual DOM fluorescing components in the EEMs.

90

91 *1.5 Meteorological Data Collection and Analysis*

92 On-site meteorological data was collected continuously with a weather station  
93 (Vantage Pro, Davis Instruments), and supplemented with data obtained locally through  
94 the Louisiana Agrilclimatic Information System (automated weather station at Ben Hur  
95 Agricultural Fields, ~5 km SE of the main sampling location).

96 Storm classification was based on cloud top data retrieved from The National  
97 Weather Service (NWS) archive of Geostationary Operational Environmental Satellite-  
98 East (GOES-East) infrared and visible satellite imagery and Next Generation Radar  
99 (NEXRAD) Level III radar reflectivity provided by the National Climatic Data Center's  
100 (NCDC) website (<https://www.ncdc.noaa.gov/nexradinv/>). Troposphere temperature  
101 profiles were retrieved from The NWS radiosonde data archive of stations located in  
102 Lake Charles, Louisiana (LCH, station number 72240) and Slidell Muni, Louisiana (LIX,  
103 station number 72233).

104 Classification of convective and nimbostratus precipitation based on radar  
105 reflectivity and satellite imagery was carried out according to previous methods (6, 7).  
106 Tropospheric stability indices from NWS soundings (8, 9) were used to confirm the  
107 presence or lack of Convective Available Potential Energy (CAPE), which indicates the  
108 presence of convection. Convection occurs when the surface of the earth is heated  
109 unevenly, leading to the warming of air directly above the heated surface. This warmer air  
110 is more buoyant than the surrounding air and begins to rise. Once this "parcel" of warm air  
111 rises to the "convective condensation level" (CCL), water vapor will begin to condense  
112 and form water droplets, and subsequently, a cloud develops. If precipitation came from a  
113 cloud which was formed in the presence of convection the Convective Condensation Level  
114 (CCL) was used to estimate the height of the cloud base (Supplementary Figure S1 a).

115 Convergence (Supplementary Figure S1 b) occurs when a low pressure system is present.  
116 Air in high pressure regions moves towards lower pressure regions, leading to the  
117 convergence of air masses, forcing the air to move up in the atmosphere. Warm front  
118 (Supplementary Figure S1 c) lifting occurs when a warm front advances and the less dense,  
119 warm air within that warm front is displaced upward over cooler, denser air ahead of it.  
120 Cold front (Supplementary Figure S1 d) lifting occurs when a cold front advances and  
121 displaces the warmer air ahead of it upward. Orographic lifting was not observed in this  
122 study and is not depicted. If precipitation came from a cloud which was formed in the  
123 absence of convection and by one of the prior three methods listed, the Lifted Condensation  
124 Level (LCL) was used to estimate the height of the cloud base (Supplementary Figure S1  
125 b-d).

126 As an example of how trajectories were analyzed, panels f and e in Supplementary  
127 Figure S1 show the altitudes and trajectories used for a particular rain event that occurred  
128 on August 25, 2014. The cloud base for this event was at approximately 1160 mAGL, and  
129 the cloud top was at approximately 16800 mAGL. Given that the cloud system developed  
130 through convection (Supplementary Figure S1 a), the six altitudes chosen (depicted in  
131 panels a-d as the gray dotted lines) for HYSPLIT backward trajectory analysis were *below*  
132 the cloud at the time of precipitation in Baton Rouge. The six backward trajectories were  
133 then examined for previous interactions with the MBL or surface using the tdump csv files  
134 generated by HYSPLIT, in which trajectory height, MBL height, and surface height are  
135 listed at hourly intervals for each trajectory. If at any point along the trajectory history  
136 (histories of which ranged from 120-168 hours) the air masses descended into the MBL or  
137 interacted with the ground, the geographic coordinates these interactions were recorded for

138 that event and plotted in R to determine the corresponding ecoregion (Supplementary  
139 Figure S1 f). Panel f shows the geographic coordinates of the trajectories for this  
140 precipitation event where interactions with the surface of MBL occurred. These  
141 coordinates were then mapped to the ecoregions outlined in Figure 1. Trajectory and  
142 ecoregion interactions are listed in Supplementary Dataset S1.

143 Cloud top heights were estimated using the Equilibrium Levels (EL) and  
144 Maximum Parcel Levels (MPL), in addition to NCDC’s Level III echo top data, which  
145 estimates cloud height based on recorded pressure and temperature levels. Herein,  
146 stratiform precipitation is defined specifically as precipitation that was collected from  
147 stratus and nimbostratus-like cloud systems independent of trailing stratiform regions  
148 from convective storm formations (10).

149 Once cloud formation type was determined, six unique altitudes were chosen to  
150 be analyzed for 120-168 h backward trajectory analysis based on the CCL or LCL of the  
151 precipitation event (Supplementary Figure S1a-d). Trajectories were analyzed for  
152 previous interactions with the surface and/or mixed boundary layer (MBL)  
153 (Supplementary Figure S1e). This was accomplished by downloading the “tdump.csv”  
154 files produced by HYSPLIT, which detailed the recorded height above ground level of  
155 the trajectory being analyzed, in addition to the height of the MBL.

156

### 157 *1.6 Statistical Analyses*

158 The statistical procedures (Exploratory Factor Analysis, Multiple Imputation,  
159 Analysis of Variance, Multivariate Analysis of Variance, Mann-Whitney U-Test,  
160 Welch’s Tests, Kruskal-Wallis Test, Pearson’s and Spearman’s Correlations, and

161 Tukey's Honest Significant Difference post-hoc analysis) were performed using SAS  
162 software, Version 9.4 of the SAS System for Windows. Graphs and plots were produced  
163 using R Software Version 3.2.1 (The R Core Team 2015).

164 Prior to hypothesis testing with analysis of variance (ANOVA) and multivariate  
165 analysis of variance (MANOVA), the raw data were screened for univariate and  
166 multivariate normality using The Shapiro-Wilk Test and through visual inspection of Q-  
167 Q plots. The assumption of homoscedasticity was verified using Levene's test, univariate  
168 outliers were examined based on z-score distributions, multivariate outliers identified  
169 using Mahalanobis distance, and linearity/collinearity evaluated through visual inspection  
170 of bivariate scatter plots. Log and arcsine transformations were used on distributions that  
171 violated assumptions of normality. For distributions not corrected by data  
172 transformations, hypothesis tests that assume non-normality or heteroscedasticity were  
173 used (i.e., Mann-Whitney U-test, Kruskal-Wallis one-way ANOVA, and Welch's Test).  
174 For extreme outliers (values more than three times the interquartile range), raw data  
175 values were adjusted according to the method of Tabachnick and Fidell (11).

176 Multiple imputation was used to provide missing INP concentration data prior to  
177 Exploratory Factor Analysis (EFA) and hypothesis testing. The differential INP  
178 concentrations were grouped and summed based on the results of the EFA. For example,  
179 the INP concentrations used to represent Bio-5 to -10 is the summed differential  
180 concentrations of INPs active between -5 and -10°C.

181 For hypothesis testing, the dependent variables were always the summed  
182 differential INP concentrations for each INP category determined by EFA, which were  
183 continuous variables. When the independent variables were continuous (Cell abundance,



184 pH, conductivity, major ion concentrations, DOC concentrations, PARAFAC  
185 Components C1-C3 intensities, OTU sequence reads), Pearson's R and Spearman's Rank  
186 correlational analyses were used. Note that for correlations between INP concentrations  
187 and bacterial taxa, the number of OTU sequence reads was used for the analysis. When  
188 the independent variables were categorical (ecoregion classification, cloud type, season,  
189 and precipitation type), ANOVA and MANOVA were used. For post-hoc analysis of  
190 ANOVA and MANOVA, Tukey's Honest Significant Difference (HSD) analysis was  
191 used. Tukey's HSD test is a post-hoc analysis that compares the means of each group to  
192 find significant differences between groups (11).  
193

194 **References**

195

- 196 1. Caporaso JG, Lauber CL, Walters WA, Berg-Lyons D, Huntley J, Fierer N, Owens  
197 SM, Betley J, Fraser L, Bauer M, Gormley N, Gilbert JA, Smith G, Knight R. 2012.  
198 Ultra-high-throughput microbial community analysis on the Illumina HiSeq and  
199 MiSeq platforms. *ISME J* 6:1621–1624.
- 200 2. Schloss PD, Westcott SL, Ryabin T, Hall JR, Hartmann M, Hollister EB,  
201 Lesniewski RA, Oakley BB, Parks DH, Robinson CJ, Sahl JW, Stres B, Thallinger  
202 GG, Horn DJV, Weber CF. 2009. Introducing mothur: Open-Source, Platform-  
203 Independent, Community-Supported Software for Describing and Comparing  
204 Microbial Communities. *Appl Environ Microbiol* 75:7537–7541.
- 205 3. Jr WEA, Tucker SA, Fetzer JC. 1991. Fluorescence Emission Properties of  
206 Polycyclic Aromatic Compounds in Review. *Polycyclic Aromatic Compounds*  
207 2:75–105.
- 208 4. Tucker SA, Acree WE. 1992. Excitation Versus Emission Spectra as a Means to  
209 Examine Selective Fluorescence Quenching Agents. *Appl Spectrosc*, AS 46:1388–  
210 1392.
- 211 5. R. Murphy K, A. Stedmon C, Graeber D, Bro R. 2013. Fluorescence spectroscopy  
212 and multi-way techniques. *PARAFAC. Analytical Methods* 5:6557–6566.
- 213 6. Anagnostou EN. 2004. A convective/stratiform precipitation classification  
214 algorithm for volume scanning weather radar observations. *Meteorological*  
215 *Applications* 11:291–300.

- 216 7. Biggerstaff MI, Listemaa SA. 2000. An Improved Scheme for  
217 Convective/Stratiform Echo Classification Using Radar Reflectivity. *J Appl Meteor*  
218 39:2129–2150.
- 219 8. Schultz P. 1989. Relationships of Several Stability Indices to Convective Weather  
220 Events in Northeast Colorado. *Wea Forecasting* 4:73–80.
- 221 9. Blanchard DO. 1998. Assessing the Vertical Distribution of Convective Available  
222 Potential Energy. *Wea Forecasting* 13:870–877.
- 223 10. Houze Jr. RA. 2014. *Cloud Dynamics*. Academic Press.
- 224 11. Tabachnick BG, Fidell LS, Ullman JB. 2019. *Using multivariate statistics* Seventh  
225 edition. Pearson, Boston.

226  
227  
228  
229  
230  
231

232  
233  
234  
235

**Supplementary Table S1. Results of Multiple Imputation for missing INP data.** Missing data column lists the variables which did not contain an observation. All missing data followed a monotone missing data pattern.

| Missing data                                                                                                                 | Sample Size | Missing Data Pattern Frequency <sup>a</sup> | Number of Imputations Performed | Relative Efficiency <sup>b</sup> | Pr >  t  <sup>c</sup> |
|------------------------------------------------------------------------------------------------------------------------------|-------------|---------------------------------------------|---------------------------------|----------------------------------|-----------------------|
| <b><i>total INPs</i></b>                                                                                                     |             |                                             |                                 |                                  |                       |
| ≤-13°C                                                                                                                       | 4           | 6.56%                                       | 5                               | 0.98                             | <0.0001               |
| ≤-14°C                                                                                                                       | 8           | 13.11%                                      | 5                               | 0.92                             | <0.0001               |
| -15°C                                                                                                                        | 3           | 4.92%                                       | 5                               | 0.92                             | <0.0001               |
| <b><i>biological INPs</i></b>                                                                                                |             |                                             |                                 |                                  |                       |
| ≤-13°C                                                                                                                       | 6           | 9.84%                                       | 5                               | 0.95                             | <0.0001               |
| ≤-14°C                                                                                                                       | 6           | 9.84%                                       | 5                               | 0.93                             | <0.0001               |
| -15°C                                                                                                                        | 4           | 6.56%                                       | 5                               | 0.89                             | <0.0001               |
| <b><i>bacterial INPs</i></b>                                                                                                 |             |                                             |                                 |                                  |                       |
| ≤-13°C                                                                                                                       | 3           | 13.46%                                      | 5                               | 0.98                             | <0.0001               |
| ≤-14°C                                                                                                                       | 7           | 13.46%                                      | 5                               | 0.92                             | <0.0001               |
| -15°C                                                                                                                        | 7           | 5.77%                                       | 5                               | 0.95                             | <0.0001               |
| <sup>a</sup> The percent of observations containing the specified missing data                                               |             |                                             |                                 |                                  |                       |
| <sup>b</sup> Measure of how well the imputation calculations converged, as described in Li et al., JAMA 314:1966–1967, 2015. |             |                                             |                                 |                                  |                       |
| <sup>c</sup> P-value for t-test of H <sub>0</sub> : mean=0                                                                   |             |                                             |                                 |                                  |                       |

236  
237  
238  
239  
240  
241  
242  
243  
244  
245  
246  
247  
248  
249  
250  
251  
252  
253  
254  
255  
256  
257  
258  
259  
260  
261  
262

263 **Supplementary Table S2.** MANOVA results of INP concentrations, interactions of air  
 264 masses, and ecoregions. PM, Pacific Maritime; NAM, North Atlantic Maritime; SAM,  
 265 South Atlantic Maritime; NFM, Northwest Forested Mountains; DSAH, Desert and  
 266 Semi-Arid Highlands; HNL, High Northern Latitudes; GP, Great Plains; EWW, Eastern  
 267 Woodlands and Wetlands; EA, East Asia.

268

| INP class                                                                                                                                                                                                       | Ecoregions of significance <sup>a</sup>       |                                              | ANOVA test results |
|-----------------------------------------------------------------------------------------------------------------------------------------------------------------------------------------------------------------|-----------------------------------------------|----------------------------------------------|--------------------|
|                                                                                                                                                                                                                 | <u>Highest INP concentrations<sup>a</sup></u> | <u>Lowest INP concentrations<sup>a</sup></u> |                    |
|                                                                                                                                                                                                                 |                                               |                                              | Prob > F           |
| total <sub>-5 to -11</sub>                                                                                                                                                                                      | EA, HNL                                       | NAM, SAM                                     | P < 0.0001         |
| total <sub>-11 to -14</sub>                                                                                                                                                                                     | EA                                            | NAM, SAM, EWW, DSAH                          | P < 0.001          |
| bio <sub>-5 to -10</sub>                                                                                                                                                                                        | EA, HNL                                       | NAM, SAM                                     | P < 0.0001         |
| bio <sub>-13 to -14</sub>                                                                                                                                                                                       | EA                                            | NAM, SAM, EWW, DSAH                          | P < 0.0001         |
| bio <sub>-11 to -12</sub>                                                                                                                                                                                       | NFM                                           | NAM                                          | P < 0.05           |
| bac <sub>-5 to -10</sub>                                                                                                                                                                                        | EA, HNL                                       | SAM, EWW, DSAH                               | P < 0.001          |
| <sup>a</sup> Based on significant differences in INP concentrations between ecoregions determined via Tukey-Kramer HSD Connecting Letters Report (MANOVA post-hoc analysis) at a confidence level of alpha=0.05 |                                               |                                              |                    |

269  
 270  
 271  
 272  
 273  
 274  
 275  
 276  
 277  
 278  
 279  
 280  
 281  
 282  
 283  
 284  
 285  
 286  
 287  
 288  
 289  
 290  
 291

292 **Supplementary Table S3. Characteristics of fluorescent dissolved organic matter**  
 293 **PARAFAC components in precipitation from air masses interacting with distinct**  
 294 **ecoregions.** Ecoregions are based on Level 1 Ecoregions defined by the EPA and CEC. The  
 295 PARAFAC component means are shown as Raman Units. Numbers following ecoregion name  
 296 correspond to numbers listed in the ecoregion column of Supplementary Dataset S1.

297  
298  
299  
300  
301  
302  
303  
304  
305  
306  
307  
308  
309  
310  
311  
312  
313  
314  
315  
316  
317  
318  
319  
320  
321  
322  
323  
324  
325  
326  
327  
328  
329  
330  
331  
332  
333  
334

| <b>Ecoregion</b>                          | <b>Avg. Fluorescence Intensity Maximum</b> |
|-------------------------------------------|--------------------------------------------|
| <b>Pacific Maritime (1)</b>               | C1: 0.0035<br>C2: 0.0072<br>C3: 0.0017     |
| <b>North Atlantic Maritime (3)</b>        | N/A                                        |
| <b>South Atlantic Maritime (4)</b>        | C1: 0.0036<br>C2: 0.0062<br>C3: 0.0040     |
| <b>Northwest Forested Mountains (5)</b>   | C1: 0.0041<br>C2: 0.0065<br>C3: 0.0035     |
| <b>Desert and Semi-Arid Highlands (6)</b> | C1: 0.0043<br>C2: 0.0066<br>C3: 0.0037     |
| <b>High Northern Latitudes (7)</b>        | C1: 0.0071<br>C2: 0.0083<br>C3: 0.0032     |
| <b>Great Plains (8)</b>                   | C1: 0.0035<br>C2: 0.0053<br>C3: 0.0015     |
| <b>Eastern Woodlands and Wetlands (9)</b> | C1: 0.0041<br>C2: 0.0062<br>C3: 0.0036     |
| <b>East Asia (11)</b>                     | C1: 0.0071<br>C2: 0.0083<br>C3: 0.0032     |

335 **Supplementary Table S4.** Results of multivariate analysis of variance (MANOVA) for  
336 all INP (total, biological, and bacterial) concentrations as a function of season, cloud  
337 type, and precipitation type.

| Meteorological Parameter                                                                                                                            | MANOVA Test Results                    |
|-----------------------------------------------------------------------------------------------------------------------------------------------------|----------------------------------------|
| Season                                                                                                                                              | F(15, 122) = 3.12<br><b>p = 0.0003</b> |
| Cloud Type                                                                                                                                          | F(5, 46) = 2.47<br><b>p=0.0462</b>     |
| Precipitation Type                                                                                                                                  | F(5, 46) = 2.45<br><b>p=0.0472</b>     |
| Bolded <i>p</i> -values indicate statistically significant differences between air masses tested at alpha=0.05 level<br>Whole Model, F Test, Prob>F |                                        |

338  
339  
340  
341  
342  
343  
344  
345  
346  
347  
348  
349  
350  
351  
352  
353

354 **Supplementary Table S5. Correlations between ice nucleating particle (INP) factors and**  
 355 **local meteorological conditions.** Pearson correlation coefficients (*r*) calculated between INP  
 356 factors and locally recorded meteorological data. Relative humidity (RH%). Significance levels  
 357 of Pearson correlation coefficients: \**p* < .05, \*\**p* < .01, \*\*\**p* < .001. Cloud top temperature,  
 358 surface temperature, surface wind speed N=61; Relative humidity, rain amount N=60.

359

| <b>INP Factor</b>           | <b>Cloud top temperature (°C)</b> | <b>Surface Temperature (°C)</b> | <b>RH %</b> | <b>Rain Amount (mm h<sup>-1</sup>)</b> | <b>Surface wind speed (mph)</b> |
|-----------------------------|-----------------------------------|---------------------------------|-------------|----------------------------------------|---------------------------------|
| <b><i>Total</i></b>         |                                   |                                 |             |                                        |                                 |
| total <sub>-5 to -11</sub>  | .07                               | -.53***                         | -.24        | .06                                    | .45***                          |
| total <sub>-11 to -14</sub> | .01                               | .30*                            | -.08        | -.18                                   | -.17                            |
| <b><i>Biological</i></b>    |                                   |                                 |             |                                        |                                 |
| bio <sub>-5 to -10</sub>    | .06                               | -.53***                         | -.24        | .05                                    | .45***                          |
| bio <sub>-13 to -14</sub>   | -.05                              | -.01                            | -.03        | -.07                                   | -.12                            |
| bio <sub>-11 to -12</sub>   | .18                               | -.029*                          | -.005       | -.14                                   | .04                             |
| <b><i>Bacterial</i></b>     |                                   |                                 |             |                                        |                                 |
| bac <sub>-5 to -10</sub>    | -.01                              | -.051***                        | -.30*       | -.12                                   | .32*                            |

360  
 361  
 362  
 363  
 364  
 365  
 366  
 367  
 368  
 369  
 370  
 371  
 372  
 373  
 374  
 375  
 376  
 377  
 378  
 379  
 380  
 381  
 382  
 383  
 384



385 **Supplementary Table S6.** Significant Spearman's rank correlation coefficients (for which rho  
386  $\rho \geq 0.40$ ; and significance  $p < 0.05$ ) between ice nucleating particle (INP) factors and taxon  
387 abundance. Significance levels of Spearman's rank correlation coefficients: \* $p < .05$ , \*\* $p < .01$ ,  
388 \*\*\* $p < .001$ . Only taxa with relative abundance  $> 0.1\%$  for total number of sequence reads across  
389 all precipitation events were analyzed. Total number of sequence reads across all precipitation  
390 events are listed in last column.

|                                                                                                          | <b>total-5 to<br/>-11</b> | <b>total-11 to<br/>-14</b> | <b>bio-5 to -10</b>       | <b>bio-11 to<br/>-12</b>  | <b>bio-13 to<br/>-14</b>  | <b>bac-5 to -10</b>       | <b>No.<br/>Sequence<br/>Reads</b> |
|----------------------------------------------------------------------------------------------------------|---------------------------|----------------------------|---------------------------|---------------------------|---------------------------|---------------------------|-----------------------------------|
| <b>Taxon (Order;<br/>Family; Genus)</b>                                                                  | Spearman's rho ( $\rho$ ) | Spearman's rho ( $\rho$ )  | Spearman's rho ( $\rho$ ) | Spearman's rho ( $\rho$ ) | Spearman's rho ( $\rho$ ) | Spearman's rho ( $\rho$ ) |                                   |
| <b>Acidobacteria</b>                                                                                     |                           |                            |                           |                           |                           |                           |                                   |
| <i>Acidobacteriales;</i><br><i>Acidobacteriaceae;</i><br><i>Candidatus</i><br><i>Chloracidobacterium</i> | --                        | --                         | 0.41*                     | --                        | --                        | --                        | 5674                              |
| <b>Bacteroidetes</b>                                                                                     |                           |                            |                           |                           |                           |                           |                                   |
| <i>Bacteroidales;</i><br><i>Rikenellaceae;</i> N/A                                                       | 0.62***                   | 0.43*                      | 0.59***                   | --                        | 0.55***                   | 0.54**                    | 81                                |
| <i>Sphingobacteriales;</i><br>N/A; N/A                                                                   | 0.51**                    | --                         | 0.53**                    | --                        | --                        | --                        | 67269                             |
| <i>Cytophagales;</i><br><i>Cyclobacteriaceae;</i><br>N/A                                                 | --                        | 0.40*                      | --                        | --                        | --                        | --                        | 514                               |
| <i>Cytophagales;</i><br><i>Cyclobacteriaceae;</i><br><i>Algoriphagus</i>                                 | --                        | --                         | --                        | 0.45*                     | --                        | --                        | 69                                |
| <i>Cytophagales;</i><br><i>Cytophagaceae;</i> N/A                                                        | 0.51**                    | --                         | 0.55***                   | --                        | --                        | 0.43*                     | 28658                             |
| <i>Cytophagales;</i><br><i>Hymenobacteraceae;</i><br><i>Hymenobacter</i>                                 | 0.56***                   | 0.42*                      | 0.59***                   | --                        | --                        | 0.48**                    | 19161                             |
| <i>Cytophagales;</i><br><i>Cytophagaceae;</i><br><i>Spirosoma</i>                                        | --                        | --                         | 0.41*                     | --                        | --                        | --                        | 4486                              |
| <i>Chitinophagales;</i><br><i>Chitinophagaceae;</i><br><i>Segetibacter</i>                               | 0.55***                   | 0.45*                      | 0.53**                    | --                        | 0.44*                     | 0.55**                    | 294                               |
| <i>Sphingobacteriales;</i><br>env.OPS_17; N/A                                                            | 0.52**                    | 0.45*                      | 0.44*                     | --                        | 0.52**                    | 0.46*                     | 672                               |
| <i>Cytophagales;</i><br><i>Cytophagaceae;</i><br><i>Flexibacter</i>                                      | 0.42*                     | 0.53**                     | 0.44*                     | 0.48**                    | --                        | --                        | 277                               |
| <i>Sphingobacteriales;</i><br><i>Sphingobacteriaceae;</i><br>N/A                                         | 0.41*                     | --                         | 0.40*                     | --                        | --                        | --                        | 20330                             |

|                                                                                    | <b>total-5 to<br/>-11</b> | <b>total-11 to<br/>-14</b> | <b>bio-5 to -10</b> | <b>bio-11 to<br/>-12</b> | <b>bio-13 to<br/>-14</b> | <b>bac-5 to -10</b> | <b>No.<br/>Sequence<br/>Reads</b> |
|------------------------------------------------------------------------------------|---------------------------|----------------------------|---------------------|--------------------------|--------------------------|---------------------|-----------------------------------|
| <b>Candidate Division<br/>TM6</b>                                                  | --                        | --                         | --                  | --                       | 0.42*                    | --                  | 81                                |
| <b>Chlorobi</b>                                                                    |                           |                            |                     |                          |                          |                     |                                   |
| <i>Chlorobiales</i> ; N/A;<br>N/A                                                  | 0.42*                     | --                         | --                  | --                       | --                       | --                  | 144                               |
| <b>Cyanobacteria</b>                                                               | --                        | --                         | 0.40*               | --                       | --                       | --                  | 707954                            |
| <b>Firmicutes</b>                                                                  |                           |                            |                     |                          |                          |                     |                                   |
| <i>Bacillales</i> ;<br><i>Planococcaceae</i> ;<br><i>Planococcus</i>               | --                        | 0.53**                     | --                  | --                       | --                       | --                  | 888                               |
| <i>Bacillales</i> ;<br><i>Staphylococcaceae</i> ;<br><i>Macrococcus</i>            | --                        | 0.57***                    | --                  | --                       | 0.41*                    | --                  | 271                               |
| <i>Clostridiales</i> ;<br><i>Lachnospiraceae</i> ;<br><i>Blautia</i>               | 0.43*                     | 0.56***                    | 0.43*               | --                       | --                       | --                  | 75                                |
| <i>Clostridiales</i> ;<br><i>Lachnospiraceae</i> ;<br><i>Roseburia</i>             | --                        | 0.41*                      | --                  | --                       | --                       | --                  | 53                                |
| <i>Erysipelotrichales</i> ;<br><i>Erysipelotrichaceae</i> ;<br><i>Turicibacter</i> | --                        | 0.47**                     | --                  | --                       | --                       | --                  | 679                               |
| <i>Lactobacillales</i> ;<br><i>Carnobacteriaceae</i> ;<br>N/A                      | 0.47**                    | 0.49**                     | 0.46*               | --                       | --                       | 0.40*               | 642                               |
| <i>Lactobacillales</i> ;<br><i>Carnobacteriaceae</i> ;<br><i>Carnobacterium</i>    | 0.41*                     | 0.48**                     | 0.43*               | --                       | --                       | --                  | 157                               |
| <i>Lactobacillales</i> ;<br><i>Carnobacteriaceae</i> ;<br><i>Desemzia</i>          | --                        | --                         | 0.40*               | --                       | --                       | --                  | 91                                |
| <i>Lactobacillales</i> ;<br><i>Lactobacillaceae</i> ; N/A                          | --                        | 0.42*                      | --                  | --                       | --                       | --                  | 16067                             |
| <i>Lactobacillales</i> ;<br><i>Leuconostocaceae</i> ;<br><i>Leuconostoc</i>        | --                        | --                         | --                  | --                       | 0.47**                   | --                  | 457                               |
| <b>Planctomycetes</b>                                                              |                           |                            |                     |                          |                          |                     |                                   |
| <i>Planctomycetales</i> ;<br><i>Planctomycetaceae</i> ;<br><i>Planctomyces</i>     | --                        | 0.47**                     | --                  | --                       | --                       | --                  | 105                               |
| <b>Proteobacteria</b>                                                              |                           |                            |                     |                          |                          |                     |                                   |
| <i>Campylobacterales</i> ;<br><i>Campylobacteraceae</i> ;<br><i>Arcobacter</i>     | --                        | 0.45*                      | --                  | 0.43*                    | --                       | --                  | 300                               |
| <i>Bacteriovorales</i> ;<br><i>Bacteriovoraceae</i> ;<br>N/A                       | --                        | 0.45*                      | --                  | --                       | --                       | --                  | 770                               |
| <i>Bacteriovorales</i> ;<br><i>Bacteriovoraceae</i> ;<br><i>Peredibacter</i>       | --                        | 0.47**                     | --                  | --                       | --                       | --                  | 730                               |

|                                                                                    | <b>total-5 to<br/>-11</b> | <b>total-11 to<br/>-14</b> | <b>bio-5 to -10</b> | <b>bio-11 to<br/>-12</b> | <b>bio-13 to<br/>-14</b> | <b>bac-5 to -10</b> | <b>No.<br/>Sequence<br/>Reads</b> |
|------------------------------------------------------------------------------------|---------------------------|----------------------------|---------------------|--------------------------|--------------------------|---------------------|-----------------------------------|
| <i>Rhizobiales;</i><br><i>Methylocystaceae;</i><br><i>Methylosinus</i>             | --                        | --                         | --                  | 0.45*                    | --                       | --                  | 523                               |
| <i>Sphingomonadales;</i><br><i>Erythrobacteraceae;</i><br>N/A                      | --                        | --                         | --                  | --                       | 0.41*                    | --                  | 1190                              |
| <i>Oceanospirillales;</i><br><i>Oceanospirillaceae;</i><br>N/A                     | --                        | 0.44*                      | --                  | --                       | 0.42*                    | --                  | 66                                |
| <i>Pseudomonadales;</i><br><i>Moraxellaceae;</i><br><i>Perlucidibaca</i>           | --                        | 0.41*                      | --                  | --                       | --                       | --                  | 2013                              |
| <i>Burkholderiales;</i><br><i>Comamonadaceae;</i><br><i>Polaromonas</i>            | --                        | --                         |                     |                          |                          | 0.42*               | 108                               |
| <i>Chromatiales;</i><br><i>Chromatiaceae;</i><br><i>Rheinheimera</i>               | --                        | 0.50*                      | --                  | --                       | --                       | --                  | 912                               |
| <i>Rhodocyclales;</i><br><i>Rhodocyclaceae;</i> N/A                                | 0.47**                    | --                         | --                  | --                       | 0.52**                   | 0.48*               | 8105                              |
| <i>Rhodospirillales;</i><br>wr0007; N/A                                            | --                        | --                         | --                  | 0.40*                    | --                       |                     | 1094                              |
| <i>Xanthomonadales;</i><br><i>Xanthomonadaceae;</i><br>N/A                         | 0.47**                    | 0.44*                      | 0.49**              | --                       | --                       | --                  | 14094                             |
| <b>Spirochaetes</b>                                                                |                           |                            |                     |                          |                          |                     |                                   |
| <i>Spirochaetales;</i> N/A;<br>N/A                                                 | --                        | 0.41*                      | --                  | --                       | 0.43*                    | --                  | 93                                |
| <b>Verrucomicrobia</b>                                                             |                           |                            |                     |                          |                          |                     |                                   |
| <i>Chthoniobacterales;</i><br><i>Chthoniobacteraceae;</i><br><i>Chthoniobacter</i> | --                        | --                         | --                  | --                       | 0.42*                    | --                  | 510                               |
| <b>Unclassified</b>                                                                |                           |                            |                     |                          |                          |                     |                                   |
| Unclassified; OTU20                                                                | --                        | --                         | --                  | --                       | --                       | 0.40*               | 425                               |
| Unclassified; OTU32                                                                | --                        | --                         | --                  | --                       | --                       | 0.42*               | 175                               |
| Unclassified; OTU43                                                                | --                        | --                         | --                  | --                       | 0.43*                    | --                  | 1020                              |
| Unclassified; OTU51                                                                | --                        | --                         | --                  | 0.43*                    | --                       | --                  | 1051                              |
| Unclassified; OTU73                                                                | 0.52**                    | 0.45*                      | 0.44*               | --                       | 0.52**                   | 0.46*               | 351                               |
| Unclassified; OTU74                                                                | --                        | --                         | --                  | 0.42*                    | --                       | --                  | 672                               |
| Unclassified; OTU88                                                                | --                        | --                         | --                  | 0.44*                    | --                       | --                  | 254                               |
| Unclassified; OTU108                                                               | --                        | --                         | --                  | --                       | 0.46*                    | --                  | 120                               |
| Unclassified; OTU13                                                                | 0.47*                     | --                         | 0.52**              | --                       | --                       | --                  | 232                               |
| Unclassified; OTU18                                                                | --                        | --                         | --                  | --                       | 0.43*                    | --                  | 146                               |
| Unclassified; OTU22                                                                | 0.44*                     | --                         | 0.51**              | --                       | --                       | --                  | 110                               |

391  
392  
393  
394

**Supplementary Table S7. Taxa with significantly different abundances based on cloud type and season.** Table lists the test performed (Mann-Whitney U-Test (MT), Welch's T-Test (WT), Kruskal-Wallis ANOVA (KA), and Welch's ANOVA (WA)) and corresponding *p*-value. Only significant *p*-values (*p*<0.05) are shown. The taxa analyzed are listed in Supplementary Table S6.

| Taxon (Order; Family; Genus)                                                       | Cloud Type | Season    |
|------------------------------------------------------------------------------------|------------|-----------|
| <b>Bacteroidetes</b>                                                               |            |           |
| <i>Cytophagales;</i><br><i>Cytophagaceae;</i> N/A                                  | WT 0.0291  | WA 0.0112 |
| <i>Cytophagales;</i><br><i>Cytophagaceae;</i> <i>Flexibacter</i>                   | WT 0.0469  | --        |
| <i>Cytophagales;</i><br><i>Hymenobacteraceae;</i><br><i>Hymenobacter</i>           | WT 0.0231  | WA 0.0108 |
| <i>Bacteroidales;</i><br><i>Rikenellaceae;</i> N/A                                 | WT 0.0384  | --        |
| <i>Sphingobacteriales;</i><br><i>Sphingobacteriaceae;</i> N/A                      | MT 0.0393  | WA 0.0209 |
| <i>Sphingobacteriales;</i> N/A;<br>N/A                                             | MT 0.0056  | WA 0.0029 |
| <b>Firmicutes</b>                                                                  |            |           |
| <i>Clostridiales;</i><br><i>Lachnospiraceae;</i> <i>Blautia</i>                    | MT 0.0005  | --        |
| <i>Lactobacillales;</i><br><i>Carnobacteriaceae;</i> N/A                           | WT 0.0233  | WA 0.0400 |
| <i>Lactobacillales;</i><br><i>Carnobacteriaceae;</i><br><i>Carnobacterium</i>      | WT 0.0003  | --        |
| <b>Planctomycetes</b>                                                              |            |           |
| <i>Planctomycetales;</i><br><i>Planctomycetaceae;</i><br><i>Planctomyces</i>       | --         | WA 0.0353 |
| <b>Proteobacteria</b>                                                              |            |           |
| <i>Campylobacterales;</i><br><i>Campylobacteraceae;</i><br><i>Arcobacter</i>       | MT 0.0031  | --        |
| <i>Rhodocyclales;</i><br><i>Rhodocyclaceae;</i> N/A                                | --         | WA 0.0111 |
| <b>Verrucomicrobia</b>                                                             |            |           |
| <i>Chthoniobacterales;</i><br><i>Chthoniobacteraceae;</i><br><i>Chthoniobacter</i> | MT 0.0118  | WA 0.0326 |
| <b>Unclassified</b>                                                                |            |           |
| Unclassified; OTU20                                                                | MT 0.0088  | KA 0.0007 |
| Unclassified; OTU32                                                                | MT 0.0432  | WA 0.0299 |
| Unclassified; OTU74                                                                | MT 0.0344  | --        |
| Unclassified; OTU13                                                                | WT 0.0278  | WA 0.0049 |
| Unclassified; OTU18                                                                | WT 0.0391  | --        |
| Unclassified; OTU22                                                                | MT 0.0187  | --        |

442 **Supplementary Table S8. Spearman correlations between ice nucleating particle (INP)**  
 443 **factors.** Correlations calculated for differential concentrations of INPs between factor groupings.  
 444 Significance levels of Pearson correlation coefficients (top number in each cell) and Spearman's  
 445 rho (bottom number in each cell): \* $p < .05$ , \*\* $p < .01$ , \*\*\* $p < .001$ .

446

|                                    | <b>total</b> <sub>-5 to -11</sub> | <b>total</b> <sub>-11 to -14</sub> | <b>bio</b> <sub>-5 to -10</sub> | <b>bio</b> <sub>-13 to -14</sub> | <b>bio</b> <sub>-11 to -12</sub> | <b>bac</b> <sub>-5 to -10</sub> |
|------------------------------------|-----------------------------------|------------------------------------|---------------------------------|----------------------------------|----------------------------------|---------------------------------|
| <b>total</b> <sub>-5 to -11</sub>  | --                                | --                                 | --                              | --                               | --                               | --                              |
| <b>total</b> <sub>-11 to -14</sub> | .08<br>.03                        | --                                 | --                              | --                               | --                               | --                              |
| <b>bio</b> <sub>-5 to -10</sub>    | .96***<br>.94***                  | .20<br>.16                         | --                              | --                               | --                               | --                              |
| <b>bio</b> <sub>-13 to -14</sub>   | -.01<br>-.07                      | .47**<br>.62***                    | .00<br>.01                      | --                               | --                               | --                              |
| <b>bio</b> <sub>-11 to -12</sub>   | .04<br>-.02                       | .53**<br>.55***                    | .00<br>-.05                     | .00<br>.06                       | --                               | --                              |
| <b>bac</b> <sub>-5 to -10</sub>    | .83***<br>.83***                  | .26<br>.32*                        | .84***<br>.83***                | .06<br>.07                       | .10<br>.15                       | --                              |

447  
 448  
 449  
 450  
 451  
 452  
 453  
 454  
 455  
 456  
 457  
 458  
 459  
 460  
 461  
 462  
 463  
 464  
 465  
 466  
  
 467  
 468  
 469

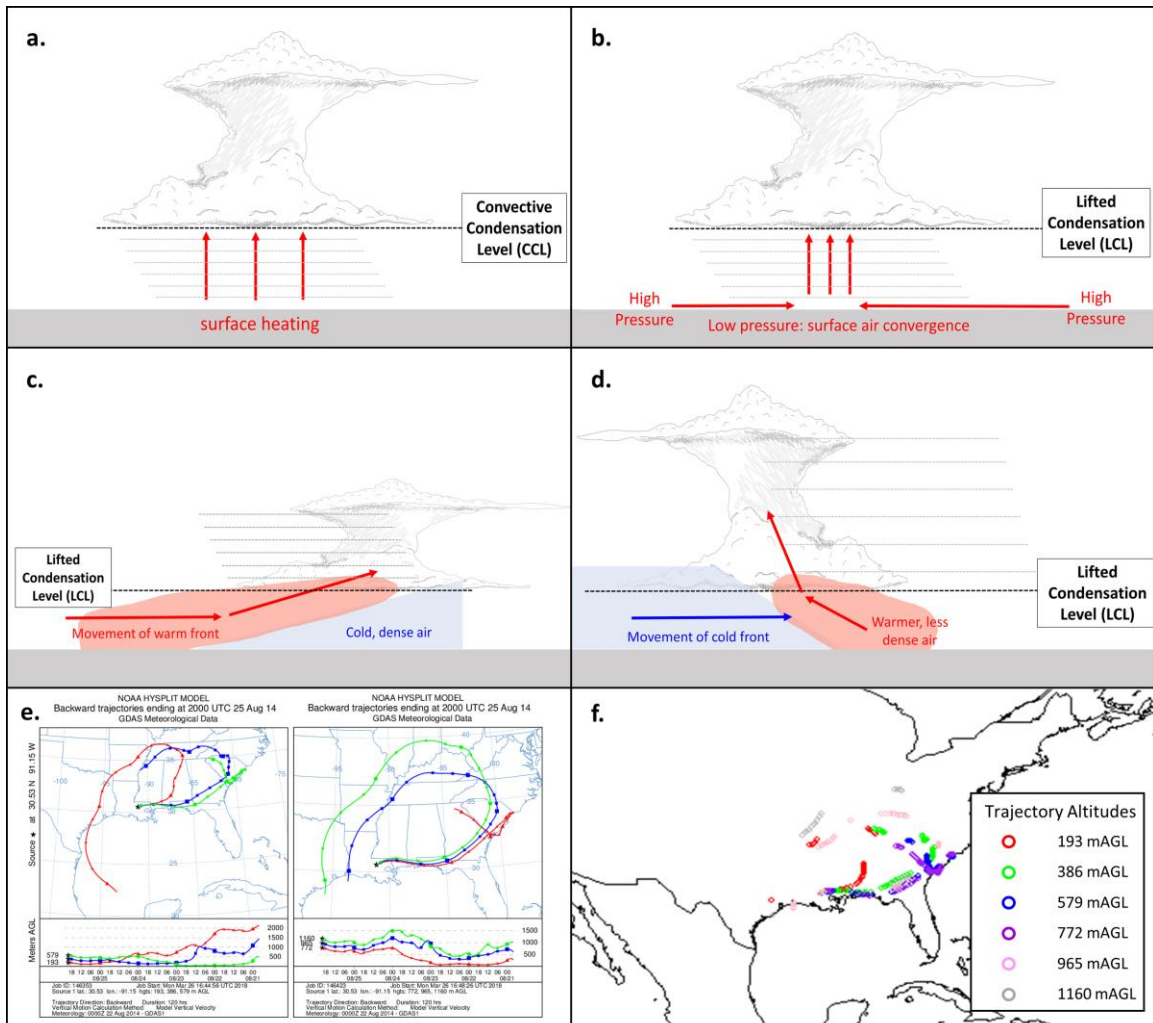

470  
471

472 **Supplementary Figure S1. Cloud formation mechanisms and HYSPLIT trajectory analysis.**

473 The mechanism of lifting for each precipitation event is important in determining the altitudes for  
 474 backward trajectory analysis. There are five general mechanisms of large-scale air movement that  
 475 lead to cloud formation, which are dealt with as described in the supplemental methods. (a)  
 476 Convection (b) Convergence (c) Warm front lifting (d) Cold front lifting. Orographic lifting was  
 477 not observed in this study and is not depicted. Panels e and f show an example of how trajectories  
 478 were analyzed, and are described in detail in the supplemental methods. Trajectory and ecoregion  
 479 interactions are listed in Supplementary Dataset S1.

480  
481

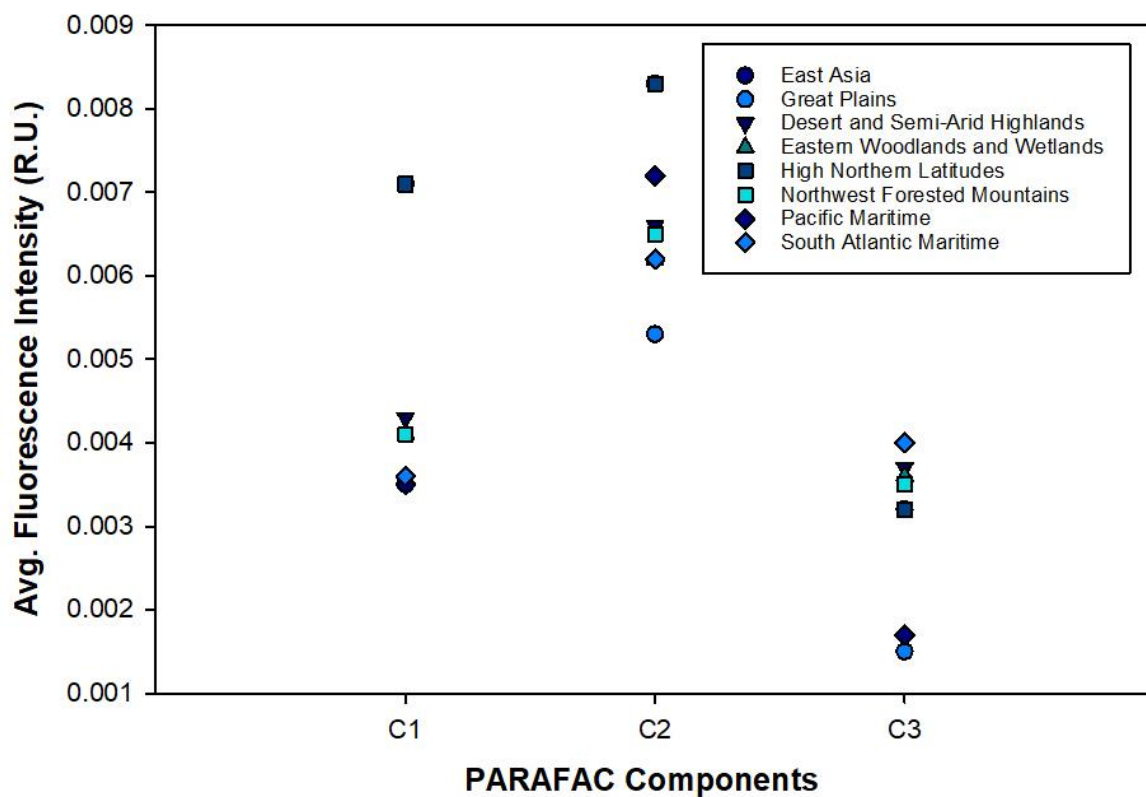

482  
 483  
 484  
 485  
 486  
 487  
 488  
 489  
 490  
 491  
 492  
 493  
 494

**Supplementary Figure S2.** PARAFAC Components fluorescence intensity profiles based on The North American Ecoregion classifications used in this study. Average Fluorescence Intensity was calculated based on ecoregion and is plotted on the y-axis in Raman Units (R.U.). PARAFAC Components C1-C3 are plotted as categories on the x-axis.

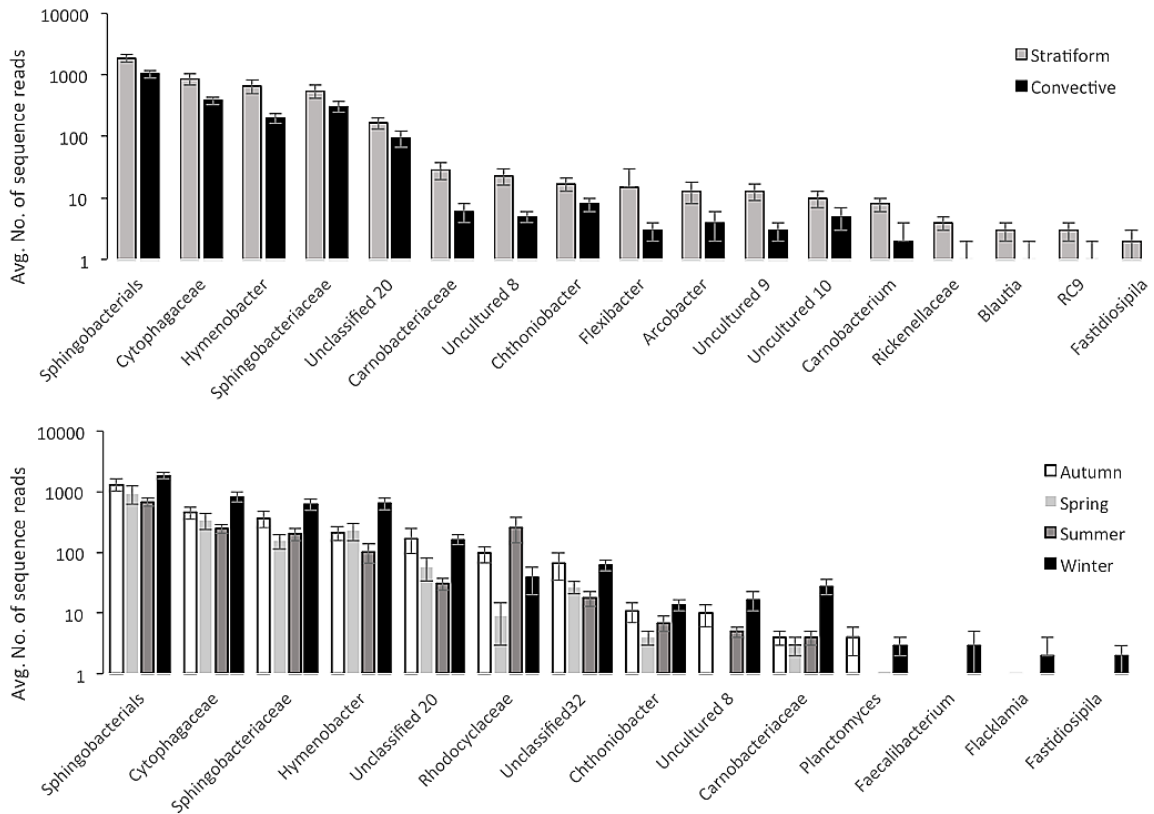

495

496 **Supplementary Figure S3. Significant differences in DNA operational taxonomic unit (OTU)**

497 **abundances as a function of cloud type and season.** The mean number of sequence reads for

498 each OTU is plotted, with bars indicating the standard error of the mean. Each taxon is represented

499 by a single unique OTU. Top: OTUs that correlated with ice nucleating particle (INP)

500 concentrations and had significantly different abundances in precipitation from stratiform (N=10)

501 and convective (N=35) cloud formations. Bottom: OTUs that correlated with INP concentrations

502 and had significantly different abundances based on season (Autumn, N=12; Spring, N=6; Summer,

503 N=14; Winter, N=13).

504

505

506

507

508

509
